# Supplementary material
Source: publisher figshare collection journal article supplement (https://karger.figshare.com/articles/dataset/_/5537485)
Supplement: Supplementary file 1 [file 1]

**Supplementary table S3: Summary of Immunohistochemistry Findings**

| Patient No. | Age (months)/Sex | Blister Cavity | Immunohistochemistry       |                         |                         |                                |              | Mutational Analysis |           |
|-------------|------------------|----------------|----------------------------|-------------------------|-------------------------|--------------------------------|--------------|---------------------|-----------|
|             |                  |                | Keratin 14<br>(NCL-LL0002) | Laminin-332<br>(P3H9-2) | Collagen IV<br>(CIV-22) | Collagen VII<br>(NCL-COLL-VII) | Diagnosis    | Gene                | Diagnosis |
| 1           | 42; Male         | Present        | Near Normal; Both sides    | Normal; Floor           | Normal; Floor           | Normal; Floor                  | EBS          | KRT5                | EBS       |
| 2           | 18; Male         | Present        | Absent                     | Normal; Floor           | Normal; Floor           | Normal; Floor                  | EBS          | KRT14               | EBS       |
| 3           | 108; Female      | Present        | Absent                     | Normal; Floor           | Normal; Floor           | Normal; Floor                  | EBS          | KRT14               | EBS       |
| 4           | 0.13; Female     | Present        | Absent                     | Normal; Floor           | Normal; Floor           | Normal; Floor                  | EBS          | KRT14               | EBS       |
| 5           | 216; Male        | Present        | Normal; Roof               | Near Normal; Floor      | Normal; Floor           | Normal; Floor                  | JEB          | LAMB3               | JEB       |
| 6           | 60; Male         | Present        | Normal; Roof               | Faint; Floor            | Normal; Floor           | Normal; Floor                  | JEB          | ITGB4               | JEB       |
| 7           | 0.03; Male       | Present        | Normal; Roof               | Faint; Floor            | Normal; Floor           | Normal; Floor                  | JEB          | ITGB4               | JEB       |
| 8           | 192; Female      | Present        | Normal; Roof               | Near Normal; Floor      | Normal; Floor           | Normal; Floor                  | JEB          | LAMB3               | JEB       |
| 9           | 96; Male         | Present        | Normal; Roof               | Near Normal; Floor      | Normal; Floor           | Normal; Floor                  | JEB          | LAMB3               | JEB       |
| 10          | 108; Male        | Present        | Normal; Roof               | Near Normal; Floor      | Normal; Floor           | Normal; Floor                  | JEB          | LAMA3               | JEB       |
| 11          | 3; Male          | Present        | Normal; Roof               | Absent                  | Normal; Floor           | Normal; Floor                  | JEB          | LAMB3               | JEB       |
| 12          | 6; Female        | Present        | Near Normal; Roof          | Normal; Floor           | Normal; Floor           | Normal; Floor                  | EBS          | COL7A1              | DEB       |
| 13          | 12; Female       | Present        | Absent                     | Absent                  | Reduced; Floor          | Absent                         | Inconclusive | COL7A1              | DEB       |
| 14          | 48; Female       | Present        | Normal; Roof               | Normal; Roof            | Normal; Roof            | Absent                         | DEB          | COL7A1              | DEB       |
| 15          | 6; Male          | Present        | Normal; Roof               | Normal; Roof            | Normal; Roof            | Absent                         | DEB          | COL7A1              | DEB       |
| 16          | 288; Male        | Present        | Normal; Roof               | Normal; Both Sides      | Reduced; Both Sides     | Faint; Both Sides              | DEB          | COL7A1              | DEB       |
| 17          | 24; Male         | Present        | Normal; Roof               | Normal; Roof            | Normal; Roof            | Absent                         | DEB          | COL7A1              | DEB       |
| 18          | 144; Male        | Present        | Near Normal; Roof          | Normal; Floor           | Normal; Floor           | Normal; Floor                  | EBS          | COL7A1              | DEB       |
| 19          | 36; Female       | Present        | Near Normal; Roof          | Normal; Floor           | Normal; Floor           | Normal; Both Sides             | EBS          | COL7A1              | DEB       |
| 20          | 26; Male         | Present        | Normal; Roof               | Normal; Roof            | Normal; Roof            | Absent                         | DEB          | COL7A1              | DEB       |
| 21          | 48; Male         | Present        | Normal; Roof               | Normal; Roof            | Normal; Roof            | Absent                         | DEB          | COL7A1              | DEB       |

**Supplementary table S3: Summary of Immunohistochemistry Findings (contd.)**

| Patient No. | Age (months)/Sex | Blister Cavity | Immunohistochemistry       |                         |                         |                                |              | Mutational Analysis |           |
|-------------|------------------|----------------|----------------------------|-------------------------|-------------------------|--------------------------------|--------------|---------------------|-----------|
|             |                  |                | Keratin 14<br>(NCL-LL0002) | Laminin-332<br>(P3H9-2) | Collagen IV<br>(CIV-22) | Collagen VII<br>(NCL-COLL-VII) | Diagnosis    | Gene                | Diagnosis |
| 22          | 48; Female       | Present        | Absent                     | Normal; Floor           | Normal; Floor           | Normal; Floor                  | EBS          | Unknown             | Unknown   |
| 23          | 360; Male        | Present        | Normal                     | Absent                  | Reduced; Roof           | Absent                         | Inconclusive | Unknown             | Unknown   |
| 24          | 12; Male         | Present        | Near Normal; Both sides    | Normal; Floor           | Normal; Floor           | Normal; Floor                  | EBS          | Unknown             | Unknown   |
| 25          | 276; Female      | Present        | Near Normal; Both sides    | Normal; Floor           | Normal; Floor           | Normal; Floor                  | EBS          | Unknown             | Unknown   |
| 26          | 36; Female       | Present        | Normal; Both sides         | Normal; Floor           | Normal; Floor           | Normal; Floor                  | EBS          | Unknown             | Unknown   |
| 27          | 60; Male         | Present        | Normal; Roof               | Normal; Roof            | Normal; Roof            | Absent                         | DEB          | Unknown             | Unknown   |
| 28          | 120; Male        | Present        | Normal; Roof               | Normal; Floor           | Normal; Floor           | Normal; Floor                  | EBS          | Unknown             | Unknown   |
| 29          | 12; Female       | Present        | Normal; Roof               | Normal; Roof            | Normal; Roof            | Absent                         | DEB          | Unknown             | Unknown   |
| 30          | 0.67; Female     | Present        | Normal; Roof               | Near Normal; Floor      | Normal; Floor           | Normal; Floor                  | JEB          | Unknown             | Unknown   |
| 31          | 72; Male         | Present        | Near Normal; Both sides    | Normal; Floor           | Normal; Floor           | Normal; Floor                  | EBS          | Unknown             | Unknown   |
| 32          | 168; Male        | Present        | Normal; Roof               | Normal; Roof            | Normal; Roof            | Absent                         | DEB          | Unknown             | Unknown   |
| 33          | 24; Female       | No Split       | Normal                     | Normal                  | Normal                  | Normal                         | Inconclusive | COL17A1             | JEB       |
| 34          | 18; Male         | No Split       | Normal                     | Normal                  | Normal                  | Normal                         | Inconclusive | COL7A1              | DEB       |
| 35          | 84; Male         | No Split       | Normal                     | Normal                  | Normal                  | Normal                         | Inconclusive | COL7A1              | DEB       |
| 36          | 168; Male        | No Split       | Normal                     | Normal                  | Normal                  | Normal                         | Inconclusive | COL7A1              | DEB       |
| 37          | 24; Male         | No Split       | Normal                     | Normal                  | Normal                  | Normal                         | Inconclusive | COL7A1              | DEB       |
| 38          | 108; Male        | No Split       | Normal                     | Normal                  | Normal                  | Reduced                        | DEB          | COL7A1              | DEB       |
| 39          | 2; Female        | No Split       | Normal                     | Normal                  | Normal                  | Normal                         | Inconclusive | COL7A1              | DEB       |
| 40          | 24; Male         | No Split       | Normal                     | Normal                  | Normal                  | Normal                         | Inconclusive | COL7A1              | DEB       |
| 41          | 60; Female       | No Split       | Normal                     | Normal                  | Normal                  | Normal                         | Inconclusive | COL7A1              | DEB       |
| 42          | 18; Female       | No Split       | Normal                     | Normal                  | Normal                  | Normal                         | Inconclusive | Unknown             | Unknown   |
| 43          | 420; Female      | No Split       | Normal                     | Normal                  | Normal                  | Normal                         | Inconclusive | Unknown             | Unknown   |
| 44          | 48; Male         | No Split       | Normal                     | Absent                  | Absent                  | Absent                         | Inconclusive | Unknown             | Unknown   |
