# Supplementary material
Source: publisher figshare collection journal article supplement (https://karger.figshare.com/articles/dataset/_/5537485)
Supplement: Supplementary file 3 [file 1]

**Suppl. table 2.** Summary of immunofluorescence antigen mapping findings

| Patient No. | Age, months/sex | Blister cavity | Immunofluorescence antigen mapping |                         |                         |                                |              | Mutational analysis |           |
|-------------|-----------------|----------------|------------------------------------|-------------------------|-------------------------|--------------------------------|--------------|---------------------|-----------|
|             |                 |                | Keratin 14<br>(NCL-LL0002)         | laminin-332<br>(P3H9-2) | collagen IV<br>(CIV-22) | collagen VII<br>(NCL-COLL-VII) | diagnosis    | gene                | diagnosis |
| 1           | 42; male        | Present        | Near normal; both sides            | Normal; floor           | Normal; floor           | Normal; floor                  | EBS          | <i>KRT5</i>         | EBS       |
| 2           | 18; male        | Present        | Absent                             | Normal; floor           | Normal; floor           | Normal; floor                  | EBS          | <i>KRT14</i>        | EBS       |
| 3           | 108; female     | Present        | Absent                             | Normal; floor           | Normal; floor           | Normal; floor                  | EBS          | <i>KRT14</i>        | EBS       |
| 4           | 0.13; female    | Present        | Absent                             | Normal; floor           | Normal; floor           | Normal; floor                  | EBS          | <i>KRT14</i>        | EBS       |
| 5           | 216; male       | Present        | Normal; roof                       | Near normal; floor      | Normal; floor           | Normal; floor                  | JEB          | <i>LAMB3</i>        | JEB       |
| 6           | 60; male        | Present        | Normal; roof                       | Faint; floor            | Normal; floor           | Normal; floor                  | JEB          | <i>ITGB4</i>        | JEB       |
| 7           | 0.03; male      | Present        | Normal; roof                       | Faint; floor            | Normal; floor           | Normal; floor                  | JEB          | <i>ITGB4</i>        | JEB       |
| 8           | 192; female     | Present        | Normal; roof                       | Near normal; floor      | Normal; floor           | Normal; floor                  | JEB          | <i>LAMB3</i>        | JEB       |
| 9           | 96; male        | Present        | Normal; roof                       | Near normal; floor      | Normal; floor           | Normal; floor                  | JEB          | <i>LAMB3</i>        | JEB       |
| 10          | 108; male       | Present        | Normal; roof                       | Near normal; floor      | Normal; floor           | Normal; floor                  | JEB          | <i>LAMA3</i>        | JEB       |
| 11          | 3; male         | Present        | Normal; roof                       | Absent                  | Normal; floor           | Normal; floor                  | JEB          | <i>LAMB3</i>        | JEB       |
| 12          | 6, female       | Present        | Near normal; roof                  | Normal; floor           | Normal; floor           | Normal; floor                  | EBS          | <i>COL7A1</i>       | DEB       |
| 13          | 12; female      | Present        | Absent                             | Absent                  | Reduced; floor          | Absent                         | Inconclusive | <i>COL7A1</i>       | DEB       |
| 14          | 48; female      | Present        | Normal; roof                       | Normal; roof            | Normal; roof            | Absent                         | DEB          | <i>COL7A1</i>       | DEB       |
| 15          | 6; male         | Present        | Normal; roof                       | Normal; roof            | Normal; roof            | Absent                         | DEB          | <i>COL7A1</i>       | DEB       |
| 16          | 288; male       | Present        | Normal; roof                       | Normal; both sides      | Reduced; both sides     | Faint; both sides              | DEB          | <i>COL7A1</i>       | DEB       |
| 17          | 24; male        | Present        | Normal; roof                       | Normal; roof            | Normal; roof            | Absent                         | DEB          | <i>COL7A1</i>       | DEB       |
| 18          | 144; male       | Present        | Near normal; roof                  | Normal; floor           | Normal; floor           | Normal; floor                  | EBS          | <i>COL7A1</i>       | DEB       |
| 19          | 36; female      | Present        | Near normal; roof                  | Normal; floor           | Normal; floor           | Normal; both sides             | EBS          | <i>COL7A1</i>       | DEB       |
| 20          | 26; male        | Present        | Normal; roof                       | Normal; roof            | Normal; roof            | Absent                         | DEB          | <i>COL7A1</i>       | DEB       |
| 21          | 48; male        | Present        | Normal; roof                       | Normal; roof            | Normal; roof            | Absent                         | DEB          | <i>COL7A1</i>       | DEB       |

**Supplementary table S2: Summary of Immunofluorescence Antigen Mapping Findings (contd.)**

| Patient No. | Age (months)/Sex | Blister Cavity | Immunofluorescence Antigen Mapping |                         |                         |                                |              | Mutational Analysis |           |
|-------------|------------------|----------------|------------------------------------|-------------------------|-------------------------|--------------------------------|--------------|---------------------|-----------|
|             |                  |                | Keratin 14<br>(NCL-LL0002)         | Laminin-332<br>(P3H9-2) | Collagen IV<br>(CIV-22) | Collagen VII<br>(NCL-COLL-VII) | Diagnosis    | Gene                | Diagnosis |
| 22          | 48; Female       | Present        | Absent                             | Normal; Floor           | Normal; Floor           | Normal; Floor                  | EBS          | Unknown             | Unknown   |
| 23          | 360; Male        | Present        | Normal                             | Absent                  | Reduced; Roof           | Absent                         | Inconclusive | Unknown             | Unknown   |
| 24          | 12; Male         | Present        | Near Normal; Both sides            | Normal; Floor           | Normal; Floor           | Normal; Floor                  | EBS          | Unknown             | Unknown   |
| 25          | 276; Female      | Present        | Near Normal; Both sides            | Normal; Floor           | Normal; Floor           | Normal; Floor                  | EBS          | Unknown             | Unknown   |
| 26          | 36; Female       | Present        | Normal; Both sides                 | Normal; Floor           | Normal; Floor           | Normal; Floor                  | EBS          | Unknown             | Unknown   |
| 27          | 60; Male         | Present        | Normal; Roof                       | Normal; Roof            | Normal; Roof            | Absent                         | DEB          | Unknown             | Unknown   |
| 28          | 120; Male        | Present        | Normal; Roof                       | Normal; Floor           | Normal; Floor           | Normal; Floor                  | EBS          | Unknown             | Unknown   |
| 29          | 12; Female       | Present        | Normal; Roof                       | Normal; Roof            | Normal; Roof            | Absent                         | DEB          | Unknown             | Unknown   |
| 30          | 0.67; Female     | Present        | Normal; Roof                       | Near Normal; Floor      | Normal; Floor           | Normal; Floor                  | JEB          | Unknown             | Unknown   |
| 31          | 72; Male         | Present        | Near Normal; Both sides            | Normal; Floor           | Normal; Floor           | Normal; Floor                  | EBS          | Unknown             | Unknown   |
| 32          | 168; Male        | Present        | Normal; Roof                       | Normal; Roof            | Normal; Roof            | Absent                         | DEB          | Unknown             | Unknown   |
| 33          | 24; Female       | No Split       | Normal                             | Normal                  | Normal                  | Normal                         | Inconclusive | COL17A1             | JEB       |
| 34          | 18; Male         | No Split       | Normal                             | Normal                  | Normal                  | Normal                         | Inconclusive | COL7A1              | DEB       |
| 35          | 84; Male         | No Split       | Normal                             | Normal                  | Normal                  | Normal                         | Inconclusive | COL7A1              | DEB       |
| 36          | 168; Male        | No Split       | Normal                             | Normal                  | Normal                  | Normal                         | Inconclusive | COL7A1              | DEB       |
| 37          | 24; Male         | No Split       | Normal                             | Normal                  | Normal                  | Normal                         | Inconclusive | COL7A1              | DEB       |
| 38          | 108; Male        | No Split       | Normal                             | Normal                  | Normal                  | Reduced                        | DEB          | COL7A1              | DEB       |
| 39          | 2; Female        | No Split       | Normal                             | Normal                  | Normal                  | Normal                         | Inconclusive | COL7A1              | DEB       |
| 40          | 24; Male         | No Split       | Normal                             | Normal                  | Normal                  | Normal                         | Inconclusive | COL7A1              | DEB       |
| 41          | 60; Female       | No Split       | Normal                             | Normal                  | Normal                  | Normal                         | Inconclusive | COL7A1              | DEB       |
| 42          | 18; Female       | No Split       | Normal                             | Normal                  | Normal                  | Reduced                        | DEB          | Unknown             | Unknown   |
| 43          | 420; Female      | No Split       | Normal                             | Normal                  | Normal                  | Normal                         | Inconclusive | Unknown             | Unknown   |
| 44          | 48; Male         | No Split       | Normal                             | Absent                  | Absent                  | Absent                         | Inconclusive | Unknown             | Unknown   |
