# Supplementary material
Source: publisher figshare collection journal article supplement (https://karger.figshare.com/articles/dataset/_/5537485)
Supplement: Supplementary file 4 [file 1 › 478856_sm2.pdf]

**Suppl. table 1.** Antibodies for immunohistochemistry and immunofluorescence  
antigen mapping

| Antibody                               | Type                                | Company                          | Clone        | Dilution | Layer stained          |
|----------------------------------------|-------------------------------------|----------------------------------|--------------|----------|------------------------|
| Cytokeratin-14                         | Mouse,<br>monoclonal                | Novocastra,<br>Newcastle, UK     | NCL-LL0002   | 1:50     | Basal<br>keratinocytes |
| Type IV<br>collagen                    | Mouse,<br>monoclonal                | Dako,<br>Carpenteria, CA,<br>USA | CIV-22       | 1:100    | Lamina<br>densa        |
| Type VII<br>collagen                   | Mouse,<br>monoclonal                | Novocastra,<br>Newcastle, UK     | NCL-COLL-VII | 1:50     | Anchoring<br>fibrils   |
| Laminin-332<br>(formerly<br>laminin-5) | Mouse,<br>monoclonal                | AbCam, UK                        | P3H9-2       | 1:50     | Lamina<br>lucida       |
| FITC                                   | Rabbit,<br>polyclonal,<br>antimouse | Dako,<br>Carpenteria, CA,<br>USA | F0232        | 1:100    | Secondary<br>antibody  |
